# Supplementary material for: The Enhancement of Acylcarnitine Metabolism by 5-Heptadecylresorcinol in Brown Adipose Tissue Contributes to Improving Glucose and Lipid Levels in Aging Male Mice
Source: Nutrients. 2023 Oct 29;15(21):4597. doi: 10.3390/nu15214597 (PMC10649465; doi:10.3390/nu15214597)
Supplement: Supplementary file 1 [file nutrients-15-04597-s001.zip › Table S1 Primer sequences.xlsx]

## Sheet: Sheet1
Primer	Primer sequences (5'to3')
OCTN2-F	AAGACCTGCAGGAAGCTGAA
OCTN2-R	TCCTTGTTTTTCGTGGGTGT
CPT1b-F	GCTGCTTGCACATTTGTGTT
CPT1b-R	TGAGTGACTGGTGGGAAGAA
CACT-F	GGTGGCTGTCCAGACAAACT
CACT-R	TCCGTTTAAGAACCTCCTGG
CPT2-F	TCTTCCTGAACTGGCTGTCA
CPT2-R	GTACCCACCATGCACTACCA
18S-F	ACCGCAGCTAGGAATAATGGA
18S-R	CAAATGCTTTCGCTCTGGTC
β-actin-F	AACAGTCCGCCTAGAAGCAC
β-actin-R	CGTTGACATCCGTAAAGACC
