# Supplementary material for: The Enhancement of Acylcarnitine Metabolism by 5-Heptadecylresorcinol in Brown Adipose Tissue Contributes to Improving Glucose and Lipid Levels in Aging Male Mice
Source: Nutrients. 2023 Oct 29;15(21):4597. doi: 10.3390/nu15214597 (PMC10649465; doi:10.3390/nu15214597)
Supplement: Supplementary file 1 [file nutrients-15-04597-s001.zip › Table S2 RNA integrity.xlsx]

## Sheet: Sheet1
Rin
BAT	Ctrl					AR-C17
Young	8.8	9.2	8.6	9.3	8.4	9	7.9	8.5	9.2	8.3
Aging	8.1	8.7	9.1	8.4	9.4	8	8.9	9.5	8.2	9.3
BAC	Ctrl			AR-C17			D-Gal			D-Gal+AR-C17
	7.5	8.3	8.7	7.8	9	8.5	8.4	7.7	8.8	9.3	8.6	8.1
